1 **One-Sided Matching Portal (OSMP): a tool to facilitate rare disease patient matchmaking**

2 **Authors:**

3 Matthew Osmond,<sup>1†</sup> E. Magda Price,<sup>1†</sup> Orion J. Buske,<sup>2</sup> Mackenzie Frew,<sup>3</sup> Madeline Couse,<sup>3</sup> Taila  
4 Hartley,<sup>1</sup> Conor Klamann,<sup>3</sup> Hannah G. B. H. Le,<sup>3</sup> Jenny Xu,<sup>3</sup> Delvin So,<sup>3</sup> Anjali Jain,<sup>3</sup> Kevin Lu,<sup>3</sup> Kevin Mo,<sup>3</sup>  
5 Hannah Wyllie,<sup>1</sup> Erika Wall,<sup>1</sup> Hannah G. Driver,<sup>1</sup> Warren A. Cheung,<sup>4</sup> Ana S.A. Cohen,<sup>4,5,6</sup> Emily G.  
6 Farrow,<sup>4,5,6</sup> Isabelle Thiffault,<sup>4,5,6</sup> Care4Rare Canada Consortium,<sup>1</sup> Andrei L. Turinsky,<sup>3</sup> Tomi Pastinen,<sup>4,5,7</sup>  
7 Michael Brudno,<sup>1,2,3,8,9,10</sup> Kym M. Boycott<sup>1</sup>

8 **Affiliations:**

9 <sup>1</sup> *Children's Hospital of Eastern Ontario Research Institute, University of Ottawa, Ottawa, Canada*

10 <sup>2</sup> *PhenoTips, Toronto, Canada*

11 <sup>3</sup> *Centre for Computational Medicine, The Hospital for Sick Children, Toronto, Canada*

12 <sup>4</sup> *Genomic Medicine Center, Children's Mercy Hospital, Kansas City, Missouri, USA*

13 <sup>5</sup> *University of Missouri Kansas City School of Medicine, Kansas City, Missouri, USA*

14 <sup>6</sup> *Department of Pathology and Laboratory Medicine, Children's Mercy Hospital, Kansas City, Missouri,*  
15 *USA*

16 <sup>7</sup> *Children's Mercy Research Institute, Kansas City, Missouri, USA*

17 <sup>8</sup> *UHN DATA Team, University Health Network, Toronto, Canada*

18 <sup>9</sup> *Department of Computer Science, University of Toronto, Toronto, Canada*

19 <sup>10</sup> *Vector Institute, Toronto, Canada*

20 <sup>†</sup> *These two co-authors contributed equally to this work*

21 **Correspondence to:** Kym M Boycott, Department of Genetics, CHEO, 401 Smyth Rd, Ottawa, ON, K1H  
22 8L1, Canada; [kboycott@cheo.on.ca](mailto:kboycott@cheo.on.ca) and Matthew Osmond, Research Coordinator, CHEO, 401 Smyth Rd,  
23 Ottawa, ON, K1H 8L1, Canada; [MaOsmond@cheo.on.ca](mailto:MaOsmond@cheo.on.ca)

24 **Abstract (max 350 words)**

25 **Background:** Genomic matchmaking - the process of identifying multiple individuals with overlapping  
26 phenotypes and rare variants in the same gene - is an important tool facilitating gene discoveries for  
27 unsolved rare genetic disease (RGD) patients. Current approaches are two-sided, meaning both patients  
28 being matched must have the same candidate gene flagged. This limits the number of unsolved RGD  
29 patients eligible for matchmaking. A one-sided approach to matchmaking, in which a gene of interest is  
30 queried directly in the genome-wide sequencing data of RGD patients, would make matchmaking  
31 possible for previously undiscoverable individuals. However, platforms and workflows for this approach  
32 have not been well established.

33 **Results:** We released a beta version of the One-Sided Matching Portal (OSMP), a platform capable of  
34 performing one-sided matchmaking queries across thousands of participants stored in genomic  
35 databases. The OSMP returns variant-level and participant-level information on each variant occurrence  
36 (VO) identified in a queried gene and displays this information through a customizable data table. A  
37 workflow for one-sided matchmaking was developed so that researchers could effectively prioritize the  
38 many VOs returned from a given query. This workflow was then tested through pilot studies where two  
39 sets of genes were queried in over 2,500 individuals: 130 genes that were newly associated with disease  
40 in OMIM, and 178 candidate genes that were not yet associated with a described disease-gene  
41 association in OMIM. These pilots both returned a large number of initial VOs (12,872 and 20,308,  
42 respectively), however the workflow successfully filtered out over 99.8% of these VOs before they were  
43 sent for review by a patient's clinician. Filters on participant-level information, such as variant zygosity,  
44 participant phenotype, and whether a variant was also present in unaffected participants were  
45 especially effective in this workflow at reducing the number of false positive matches.

46 **Conclusions:** As demonstrated through the two pilot studies, one-sided matchmaking queries can be  
47 efficiently performed using the OSMP. The availability of variant-level and participant-level data is key to  
48 ensuring this approach is practical for researchers. In the future, the OSMP will be connected to  
49 additional RD databases to increase the accessibility of matchmaking to unsolved RGD patients.

50

51 **Keywords:** Rare disease, rare genetic disease, matchmaking, data sharing, genome wide sequencing,  
52 OMIM, disease gene discovery, one-sided matchmaking

## 53 **Background**

54 In the past decade, genome-wide sequencing (GWS), including both exome sequencing and genome  
55 sequencing, has become a standard tool for the diagnosis of rare genetic diseases (RGDs) in many  
56 regions of the world. Depending on the indication(s) and specific implementation, it is estimated that  
57 approximately 40% of RGD families tested by GWS will receive a diagnosis.<sup>1</sup> For comparison, the first-tier  
58 chromosomal microarray (CMA) test has an average diagnostic yield of 12.2% across a range of  
59 indications including developmental delay, dysmorphic features, intellectual disability, learning  
60 disabilities, autism and multiple congenital anomalies.<sup>2</sup> And yet despite the success of clinical GWS  
61 testing, a significant portion of families with RGD remain undiagnosed following their clinical testing.  
62 Families without a diagnosis following clinical GWS testing fall broadly into three categories: 1) the  
63 etiology of their condition is not monogenic, and unlikely to be resolved by current genetic testing  
64 methods; 2) the genetic etiology of their condition is not detectable by the GWS method employed, e.g.  
65 a complex structural variant with exome sequencing, but might be resolved by another technology; and  
66 3) the genetic etiology of their condition is detectable by GWS, but the gene, region, or variant cannot  
67 yet be associated with disease, e.g., due to analytical challenges or insufficient evidence. In other words,  
68 families in this final group have a diagnosis within their existing sequencing data, but it is not recognized  
69 at the time of clinical testing.

70 Given the rapid pace at which new disease-gene associations and disease-variant associations are  
71 discovered each year, there is great interest in revisiting clinically generated GWS data to search for  
72 undetected molecular causes of RGDs. Many large-scale RGD research programs like the Undiagnosed  
73 Disease Network (USA, <https://undiagnosed.hms.harvard.edu/>), Genomics Answers for Kids (USA,  
74 <https://www.childrensmercy.org/childrens-mercy-research-institute/studies-and-trials/genomic-answers-for-kids/>),  
75 RD-Connect (EU, <https://rd-connect.eu/>) and our program discussed here, Care4Rare

76 (Canada, <https://www.care4rare.ca/>), leverage this approach – conducting “reanalysis” of clinically  
77 generated GWS data to search for undetected molecular causes of RGD. A review of publications  
78 involving reanalysis of clinical GWS found the median new diagnostic rate was 15%, but that it varied  
79 considerably between studies.<sup>3</sup> Working with GWS data in a research context broadens the tools and  
80 approaches that can be used to identify the molecular cause of the RGD. We recently performed a  
81 “clinical reanalysis” of a cohort of 287 families undiagnosed following clinical GWS.<sup>4</sup> The reanalysis,  
82 limited to variants in genes known to be associated with disease in the Online Mendelian Inheritance in  
83 Man (OMIM) database, led to the identification of compelling candidate variants in 39 families (14%),  
84 and ultimately resulted in diagnoses for 13 families (5%). The most common factor in making these new  
85 diagnoses was the availability of new genomic knowledge, including new disease-gene associations,  
86 disease-variant associations, and phenotype expansions of existing conditions. These findings indicate  
87 that some undiagnosed RGD families will receive a diagnosis due to advances in global genomics  
88 knowledge if their data is revisited over time.

89 While periodic clinical reanalysis may capture diagnoses in newly described disease associations, it fails  
90 to address facilitating the discovery of the estimated thousands of novel disease-genes in real-time.<sup>5</sup>  
91 RGD families with conditions with an unknown molecular etiology will remain undiagnosed until enough  
92 evidence is generated to associate a causal gene with their specific disease. An important criterion to  
93 substantiate such an association is the identification of multiple unrelated probands with pathogenic  
94 variants in the same gene and overlapping phenotype such that they are believed to have the same  
95 undescribed disease.<sup>6</sup> The process of identifying similar families in this way is broadly called genomic  
96 matchmaking. Since RGDs are, by definition, extremely rare, the discovery of new disease genes hinges  
97 on worldwide sharing of information about undiagnosed families. To do this, tools like the Matchmaker  
98 Exchange (MME) enable submitters (who might be researchers, clinicians or RGD families) from around  
99 the world to connect and discuss potential overlap of cases.<sup>7</sup> The MME uses a two-sided approach to

100 matchmaking, in which submitters will only be matched if they have the same candidate gene flagged  
101 for their respective families. Since its inception in 2015, the MME has been heavily used by both  
102 research and clinical rare disease communities to facilitate the discovery of hundreds of novel disease-  
103 gene associations.<sup>7</sup> Care4Rare’s own experience with two-sided matchmaking through the MME reflect  
104 its utility; over just two years, Care4Rare matched on 194 novel candidate genes, resulting in 861  
105 connections with other submitters, ultimately leading to collaborations for 23 (15%) of these genes.<sup>8</sup>

106 While two-sided matchmaking has been a fundamental tool for gene discovery, the accessibility of this  
107 approach is limited for several reasons. Firstly, this hypothesis-based matching requires that each family  
108 have a candidate gene flagged (and thus must have been analyzed/reviewed) before it can be  
109 submitted. Secondly, while most databases currently connected to the MME support the inclusion of  
110 participant-level information (e.g., specific variant, zygosity, detailed phenotype, inheritance) when  
111 submitting a candidate gene for matchmaking, in our experience, most matches lack this information at  
112 the outset. Additional details on potential matches therefore must be exchanged by email after the  
113 initial match is made, which is time consuming for users.<sup>8</sup> The current two-sided matchmaking model  
114 thus limits sharable data to the small set of families who: i) have been (re)analyzed and ii) have a flagged  
115 candidate gene, and limits submitters to those with the resources to follow up on many potential  
116 matches by email. Given the amount of GWS data that is produced through clinical and research  
117 testing,<sup>9,10</sup> there are undoubtedly many untapped RGD datasets not currently available for two-sided  
118 matchmaking, restricting the ability to identify novel genetic etiologies for undiagnosed families.

119 Additional approaches to genomic matchmaking, which aim to address some of the shortcomings  
120 identified in two-sided matchmaking, have been proposed.<sup>7</sup> One-sided matchmaking, involves a single  
121 party submitting a query on a gene or variant of interest to a database of GWS data to identify  
122 undiagnosed participants with variants matching the initial query. While a network of RGD databases  
123 like the MME has not yet been established for one-sided matchmaking, multiple databases have

124 designed their own approaches to this type of matchmaking. MyGene2  
125 (<https://mygene2.org/MyGene2/>), Geno2MP (<https://geno2mp.gs.washington.edu/>), VariantMatcher  
126 (<https://variantmatcher.org/>), and Franklin (<https://franklin.genoox.com/>) have designed variant-level  
127 implementations of one-sided matchmaking, in which users can search for the presence of a specific  
128 variant within the database, and receive phenotypic information on any participant found to carry this  
129 variant.<sup>11</sup> Other platforms, such as the DatabasE of genomiC Variation and Phenotype in Humans using  
130 Ensembl Resources (DECIPHER),<sup>12</sup> RD-Connect Genome-Phenome Analysis Platform (GPAP),<sup>13</sup> and *seqr*<sup>14</sup>  
131 support a gene-level approach to one-sided matchmaking instead, where a user can query a gene of  
132 interest and all variants in this gene are returned by the queried database. In evaluating these existing  
133 approaches to one-sided matchmaking, we see gene-level one-sided matchmaking as having the  
134 potential to identify variants of interest in undiagnosed RGD families through the querying of two types  
135 of genes: 1) genes that have been recently associated with human disease; and 2) genes that have not  
136 yet been associated with a disease. Given that a gene-level approach to one-sided matchmaking has the  
137 potential to, depending on the queried database's size, return many variants, we expect additional data  
138 related to these variants will be crucial in ruling out false positive matches. To our knowledge, however,  
139 there has not been an assessment of what types of data and level of detail are needed to allow one-  
140 sided matchmaking users to filter gene-level queries down to a manageable number of variants of  
141 potential interest.

142 In this paper, we present a workflow for gene-level one-sided matchmaking and a beta version of a tool  
143 to support this approach, called the One-Sided Matching Portal (OSMP). The platform was designed with  
144 an emphasis towards providing a variety of participant-level and variant-level information inside a  
145 customizable interface, to best support users in making efficient one-sided matchmaking queries and  
146 limit the external communications required to rule potential matches in or out. To test the utility of the  
147 OSMP, as well as the one-sided matchmaking approach in general, we ran pilot studies using two sets of

148 genes to identify new variants of interest in participants enrolled in Care4Rare: 1) 130 newly described  
149 OMIM disease genes - to search for disease-causing variants that would not have been recognized at the  
150 time of analysis by the clinical diagnostic laboratory; and 2) 178 novel candidate genes previously  
151 flagged on GWS analysis performed by the Care4Rare program.

## 152 **Methods**

### 153 **The One-Sided Matchmaking Portal (OSMP)**

154 We designed and built a tool, called the One-Sided Matching Portal (OSMP,  
155 <https://github.com/ccmbioinfo/osmp>), a web-based portal that can be connected to one or more RGD  
156 databases that contain variant and health information from research participants. The beta version of  
157 the OSMP supports gene-based queries of PhenoTips® instances by fetching and displaying single  
158 nucleotide variants and small insertions or deletions from the PhenoTips® variant store and participant  
159 information from PhenoTips® participant records.<sup>15</sup> The OSMP's frontend is written using the React  
160 JavaScript library (<https://react.dev/>), and the backend is designed using a Node.js framework  
161 (<https://nodejs.org/>). User authentication is managed using a Keycloak server  
162 (<https://www.keycloak.org/>), which supports a single sign-on for users using credentials from connected  
163 RGD databases.

164 A matchmaking query using the OSMP starts with the user defining a gene of interest, the maximum  
165 allele frequency of the returned variants (with a maximum value of 0.05), the RGD database(s) to be  
166 queried, and genome reference build in which to display the results. The OSMP sends the specified  
167 query to the selected database(s) and returns a table of variant occurrences (VOs, defined as a given  
168 variant in a given participant) meeting the specified criteria. The University of California Santa Cruz  
169 (UCSC) LiftOver tool (<https://genome.ucsc.edu/cgi-bin/hgLiftOver>) converts genomic coordinates of  
170 returned VOs to the user's specified genome reference build, if necessary.



171 Each row of the result table corresponds to a specific VO, however, the rows can also be consolidated to  
172 display one unique variant per row. The results table is comprised of three categories of information  
173 returned for each VO, with multiple contributing data sources. The first category, variant information  
174 (Fig 1a), describes each variant, including its chromosome, genomic coordinates, reference allele, and  
175 alternate allele. This information is obtained from the PhenoTips® variant store, an indexed database  
176 sourced from variant files for each participant in the PhenoTips® instance. The second category, variant  
177 annotations (Fig 1b), involves more detailed variant information including predicted changes to the  
178 cDNA and amino acid sequences, the allele frequency in the gnomAD control database, and predictions  
179 of pathogenicity using the in-silico algorithms from Combined Annotation Dependent Depletion  
180 (CADD)<sup>16</sup> and SpliceAI<sup>17</sup>. OSMP annotates this information at the time the query is returned using recent  
181 gnomAD<sup>18</sup> and CADD<sup>16</sup> annotations. This “on the fly” annotation was important to harmonize variant-  
182 level annotations within and between databases to accommodate the querying of source GWS files that  
183 may have been processed using different bioinformatic pipelines or at different times. This annotation  
184 step is currently performed for genes less than 200,000 bps in size due to computing limitations of the  
185 beta version of this platform. The final category of information, participant-level details (Fig 1c), includes  
186 information specific to the participant in whom each VO is found, including the zygosity of the variant,  
187 the clinical features in the form of a standardized vocabulary known as the Human Phenotype Ontology  
188 (HPO),<sup>19</sup> and previously identified candidate genes. This information is extracted from the participant’s  
189 PhenoTips® record for each queried RGD database. The OSMP calculates some information on the fly  
190 including the number of heterozygous and homozygous participants returned for each VO (across all  
191 queried database(s)), as well as the number of VOs a participant has across the query gene (termed  
192 “burden”). Burden is especially important for identifying participants with potentially compound  
193 heterozygous VOs. A more detailed description of each data column returned or calculated by the OSMP  
194 is available in Additional File 1.

195 The results table displayed by the OSMP is flexible, allowing users to customize the interface to best fit  
196 their workflow. Columns can be rearranged within the table or hidden, and each column can be filtered  
197 independently to narrow down to a list of VOs of interest. These filters are applied through the user's  
198 local internet browser, meaning they are instantaneous and do not require an OSMP query to be rerun if  
199 filters are changed.

## 200 **Participant population**

201 The beta version of the OSMP is connected to a single database, Genomics4RD,<sup>20</sup> that houses data from  
202 thousands of participants enrolled in the Care4Rare Canada RGD gene discovery research program.<sup>21</sup>  
203 Table 1 provides an overview of the participant demographics within Genomics4RD at the time of each  
204 of the two OSMP pilot studies. These participants include individuals who are affected with a RGD, many  
205 of whom are undiagnosed, as well as their unaffected family members. Affected participants in  
206 Genomics4RD are phenotyped using HPO terms, with participants having between 1 and 79 terms listed.  
207 Many of these affected participants presented with neurodevelopmental disorders, with the most  
208 common HPO terms across the database being global developmental delay (HP:0001263), seizures  
209 (HP:0001250), delayed speech and language development (HP:0000750), short stature (HP:0004322),  
210 and generalized hypotonia (HP:0001290). Numerous participants had one or more genes flagged in their  
211 record, classified as either as candidates, i.e., their role in the participant's condition was inconclusive,  
212 or causal, i.e., they were a likely explanation for some or all of the participant's presentation. Finally,  
213 participants had GWS data uploaded to their records, which had been aligned and annotated using the  
214 Care4Rare bioinformatics pipeline.<sup>22</sup>

215

216 **Table 1 Genomics4RD participants at the time of each pilot study.**

|                                                            | <b>2022 OMIM gene pilot</b> | <b>2023 Novel gene pilot</b> |
|------------------------------------------------------------|-----------------------------|------------------------------|
| Total participants, n                                      | 2,503                       | 4,063                        |
| Unaffected participants, n (%)                             | 1,152 (46%)                 | 1,934 (48%)                  |
| Affected participants, n (%)                               | 1,351 (54%)                 | 2,129 (52%)                  |
| With 1 or more identified candidate or causal genes, n (%) | 618 (46%)                   | 791 (37%)                    |

217

### 218 **A workflow for one-sided matchmaking**

219 One-sided matchmaking on a gene level is expected to result in many potential matches, since it will  
220 return all VOs that exist for a given gene. We therefore devised a workflow to filter the large number of  
221 returned VOs down to a smaller, more manageable list of those most likely to be disease-causing (Fig 2).  
222 This seven-step workflow aimed to prioritize VOs that would be most likely to impact protein function  
223 and fit the inheritance pattern of a queried gene in participants with phenotypic overlap with the  
224 condition of interest.

225 The first applied filter was based on predicted protein function (i.e., the **consequence filter**). VOs that  
226 were predicted by Ensembl's Variant Effect Predictor (VEP)<sup>23</sup> to have a low impact on protein behaviour  
227 (i.e., variants located outside of any exon or splice site) and had a SpliceAI score less than 0.5 were  
228 filtered out. VOs that were not given a conclusive annotation by VEP bypassed this filter and proceeded  
229 to the next step.

230 Next, VOs seen at least once in a homozygous state in gnomAD were removed (i.e., **gnomAD hom filter**),  
231 as homozygous variants present in reportedly unaffected participants are unlikely to be disease-causing,  
232 regardless of the inheritance pattern for a disease-gene association.

233 At the third stage of the workflow, we defined three streams based on different inheritance patterns for  
234 a given disease-gene association: an autosomal dominant (AD) stream, an X-linked recessive (XLR)

235 stream, and an autosomal recessive (AR) stream. In each stream, a **zygosity filter** was first applied,  
236 meaning that only heterozygous VOs were kept in the AD stream, hemizygous VOs were kept in the XLR  
237 stream and homozygous, or occurrences of multiple heterozygous VOs in the same participant, were  
238 kept in the AR stream. For VOs in genes associated with AD disease with a severe pediatric onset, we  
239 applied an additional filter to remove variant occurrences present in any zygosity in gnomAD (i.e.,  
240 **gnomAD het filter**), since this control database is expected to be largely absent of severe pediatric  
241 disease.<sup>18</sup>

242 Next, we used the queried genomic database as a control cohort, similar to how the gnomAD filters  
243 were used. If a VO was seen in an unaffected participant with the inheritance pattern anticipated for the  
244 disease-gene association, the VO was filtered out (i.e., **affected status filter**). For example, when  
245 querying an AR disease-gene association, a homozygous VO in an unaffected participant would result in  
246 the VO being filtered out for them and any other participant homozygous for that same variant.

247 Finally, we were left with a prioritized list of VOs with which to perform phenotype/genotype correlation  
248 with the original disease-gene query. The HPO terms of each participant with a remaining VO were  
249 compared to the clinical descriptions of the disease being queried by a certified genetic counsellor  
250 (Author MO). VOs in participants with insufficient phenotype overlap with queried disease features  
251 were removed (i.e., **phenotype filter**), and remaining VOs were then manually reviewed using external  
252 information sources (i.e., **external data filter**). Such information included ClinVar variant classifications,  
253 detailed clinical notes, and sequencing data from family members not included in the RGD database. The  
254 VOs remaining following this final filter were reviewed by a multidisciplinary team including medical  
255 geneticists, laboratory geneticists, and genetic counsellors to determine if they warranted clinical  
256 validation or further investigation.

## 257 **Results**

## 258 **One-Sided Matchmaking Pilot – OMIM Genes**

259 Our first pilot of the one-sided matchmaking workflow using the beta version of the OSMP involved  
260 querying a set of genes recently associated with disease in OMIM (i.e., OMIM gene pilot). As these  
261 disease-gene associations would not have been documented at the time of clinical GWS analysis, we  
262 hypothesized this gene set may be enriched for disease-causing variants in unsolved RGD patients in the  
263 Genomics4RD database. First, a list of new disease-gene associations added to OMIM between  
264 November 2021 and August 2022 was generated (n=227). These associations were then narrowed down  
265 to genes with sizes that fit within the OSMP's current memory limitation of 200,000bps. Finally, the  
266 remaining associations were manually reviewed to prioritize diseases with presentations most relevant  
267 to the Genomics4RD patient population (i.e., diseases that severely impact a single system, or multiple  
268 systems), resulting in a final list of 130 disease-gene associations (across 116 unique genes, i.e., 14 genes  
269 had two newly described disease associations) to be queried using the OSMP. Approximately 63%  
270 (82/130) of the disease-gene associations were for AR conditions, 32% (42/130) for AD conditions, and  
271 5% (6/130) for XLR conditions.

272 In total, 12,872 VOs with an allele frequency of 0.01 or less in Genomics4RD were returned by the OSMP  
273 across the 130 disease-gene associations queried. Figure 2 and Table 1 detail the number and  
274 proportions of VOs removed at each stage of the workflow, respectively. The consequence filter  
275 removed 35% of the VOs with a VEP-annotated impact. Next, filtering out VOs seen in a homozygous  
276 state in gnomAD removed 27% of remaining VOs. The effectiveness of the zygosity filter varied across  
277 the inheritance patterns, with 11% of the remaining VOs filtered out VOs for AD associations, 51% of  
278 VOs for XLR associations, and 94% of VOs for AR disease-gene associations. For early-onset AD  
279 conditions, 68% of the VOs that passed the zygosity filter were removed due to their presence in the  
280 gnomAD database. An additional 79% of the VOs for AD disease-gene associations, 83% for XLR  
281 associations, and 74% of VOs for AR associations were removed as they were present in the anticipated

282 zygosity in unaffected participants. This resulted in 305 VOs remaining after all filters using OSMP-  
283 provided data. Across all inheritance patterns, 81% of the remaining VOs were filtered out due to  
284 insufficient phenotypic overlap with the disease synopsis in OMIM. Finally, 46% of the remaining VOs  
285 were removed following a manual review using data sources external to the OSMP. We filtered out VOs  
286 at this stage due to ClinVar classifications as benign or likely benign, variants not segregating  
287 appropriately in family members, and insufficient phenotypic overlap with the OMIM disease following  
288 review of external clinical notes. Following all filtration steps, a total of 31 VOs (0.24% of the original  
289 query results) remained across 20 newly described disease-gene associations and were prioritized for  
290 review with the multidisciplinary team: 70% (14/20) of these disease-gene associations were for  
291 autosomal dominant conditions, and 30% (6/20) were for autosomal recessive conditions. Of these, one,  
292 so far, has resulted in a diagnosis. A de novo VO in the gene *POLR3B* was identified in a patient with  
293 overlapping neurological features to the recently described association with demyelinating Charcot-  
294 Marie-Tooth disease type 1I (OMIM 619742). This variant, identified through the OMIM gene pilot, has  
295 since been classified as likely pathogenic through validation by a clinical diagnostic laboratory.

296 **Table 2. Efficacy of workflow filters in the OMIM gene and novel gene pilots.** Percentages indicate the proportion of remaining VOs removed  
 297 by each filter step.

| Filter Name                   | Filter Description                                                            | OMIM gene pilot         |              |           | Novel gene pilot |                         |              |
|-------------------------------|-------------------------------------------------------------------------------|-------------------------|--------------|-----------|------------------|-------------------------|--------------|
| <b>Consequence filter</b>     | Removes low impact VOs, unless predicted to impact splicing                   | 35%                     |              |           | 28%              |                         |              |
| <b>gnomAD hom filter</b>      | Removes VOs homozygous in >0 gnomAD samples                                   | 27%                     |              |           | 25%              |                         |              |
| <b>Zygosity filter</b>        | Removes VOs where zygosity doesn't match query inheritance                    | <b>AD</b>               | <b>XLR</b>   | <b>AR</b> | <b>AD</b>        | <b>XLR</b>              | <b>AR</b>    |
|                               |                                                                               | 11%                     | 51%          | 94%       | 3%               | 65%                     | 91%          |
| <b>gnomAD het filter</b>      | Removes VOs heterozygous in >0 gnomAD samples                                 | <b>Severe Pediatric</b> | <b>Other</b> | N/A       | N/A              | <b>Severe Pediatric</b> | <b>Other</b> |
|                               |                                                                               | 68%                     | N/A          |           |                  | 75%                     | N/A          |
| <b>Affected status filter</b> | Removes VOs with expected inheritance in >0 unaffected participants           | 79%                     | 83%          | 34%       | 82%              | 45%                     | 87%          |
| <b>Phenotype filter</b>       | Removes VOs with insufficient phenotype overlap with queried disease features | 81%                     |              |           | 91%              |                         |              |
| <b>External data filter</b>   | Removes VOs based on information external to OSMP                             | 46%                     |              |           | 67%              |                         |              |

298

## 299 **One-Sided Matchmaking Pilot – Novel Genes**

300 The second one-sided matchmaking pilot queried a set of candidate genes assigned to a disease-gene  
301 association in OMIM (designated as the novel gene pilot). These candidate genes were identified  
302 through the analysis of GWS data for unsolved RGD patients enrolled in the Care4Rare research program  
303 (criteria described by Osmond et al).<sup>8</sup> Most of these participants have records in the Genomics4RD  
304 database and are queryable via the OSMP. This second pilot had two goals: first, to validate the one-  
305 sided matchmaking workflow (i.e., do we identify the true positive participants who harbor compelling  
306 candidates in these genes), and second to identify additional families with rare variants in the same  
307 gene and overlapping phenotype that would help to build evidence for a novel disease-gene association.  
308 A list of 178 novel candidate genes was queried using the OSMP for this novel gene pilot. Approximately  
309 62% (111/178) of these genes were hypothesized to be associated with an AD condition, 33% (58/178)  
310 were hypothesized to be associated with an AR condition, and 5% (9/178) were hypothesized to be  
311 associated with an XLR condition. Of these 178 candidate genes, 140 had true positive participants with  
312 data accessible to the OSMP.

## 313 **Validation of the one-sided matchmaking workflow**

314 We queried OSMP with the set of 140 genes with VOs previously prioritized as disease-causing or strong  
315 candidates in Care4Rare families to test the one-side matchmaking workflow. After applying all filters,  
316 the VOs from 89% (124/140) of these genes remained within our prioritized list. For the 16 genes with  
317 VOs that did not pass all filters, six genes had VOs that were removed by the **consequence filter**, most  
318 commonly because the VOs occurred just outside a canonical splice site. Nine had VOs removed by the  
319 **gnomAD het filter**, as these genes were associated with a severe AD pediatric onset condition, but the  
320 VO was present in at least one individual in gnomAD. In all these cases, the presence of the variant in  
321 gnomAD had been previously identified and the variant was considered a weak novel candidate. Finally,



322 one gene had a VO that was removed by the **affected status filter**, as the variant was present in a family  
323 member marked as 'unaffected', however on reflection it was deemed that the affected status of this  
324 relative was inconclusive. Upon review, we did not believe that these false negatives warranted changes  
325 to our one-sided matchmaking protocol.

### 326 **Use of OSMP to identify additional novel candidate gene families**

327 We excluded the true positive families described above in our candidate gene query of OSMP for  
328 additional families with seemingly the same novel RGD. In total, 20,308 VOs with a maximum allele  
329 frequency of 0.01 in Genomics4RD were returned by the OSMP related to the 178 candidate genes.  
330 Figure 3 and Table 2 detail the number and proportions of VOs removed at each stage of the workflow,  
331 respectively. Overall, the **consequence filter** removed 28% of eligible VOs, and the **gnomAD het filter**  
332 removed 25% of the remaining VOs. Like the OMIM gene pilot, the efficacy of the **zygosity filter** differed  
333 between the hypothesized inheritance patterns for these novel genes. Approximately 3% of VOs for AD  
334 genes, 65% of VOs for XLR genes and 91% of VOs for AR genes were removed by this filter. Filtering out  
335 variants seen in gnomAD removed 75% of the remaining VOs from genes with a suspected early-onset  
336 AD condition. When filtering out VOs seen in unaffected participants, 82% of the VOs for AD disease-  
337 gene associations, 45% for XLR associations and 87% for AR associations were removed. This resulted in  
338 604 VOs remaining after all filters using OSMP-provided data. Filtering out participants with insufficient  
339 phenotype overlap to the original patient in which the novel gene was identified resulted in the removal  
340 of 91% of VOs across all patterns of inheritance. Finally, approximately 67% of the remaining VOs were  
341 removed using data not available directly through the OSMP. External data used to rule out these VOs  
342 was similar to the OMIM gene pilot and included sequencing data from family members not in  
343 Genomics4RD, more extensive notes on clinical presentation, and the number of hemizygotes who carry  
344 a variant in gnomAD for XLR genes. Following all filtration steps, a total of 18 VOs (0.09% of the initial  
345 query results) across 14 novel candidate genes remained for review with the multidisciplinary team. Ten

346 of these novel candidate genes were hypothesized to be associated with AD conditions (10  
347 heterozygous VOs), three genes were hypothesized to be associated with AR conditions (2 homozygous  
348 VOs, and 2 heterozygous VOs in the same participant), and one gene was thought to be associated with  
349 a XL condition (1 hemizygous VO). One of these remaining VOs is in the gene *CCDC6* and it is believed to  
350 be the molecular cause for this participant's rare disease. This heterozygous *CCDC6* variant has already  
351 been described in several other individuals in an ongoing collaboration first established through the  
352 MME, and this participant represents an addition to this cohort. Review of the other prioritized VOs is  
353 ongoing.

#### 354 **Discussion**

355 The development and piloting of the beta version of the OSMP shows that one-sided matchmaking can  
356 be effective in identifying genetic variants of interest in undiagnosed patients with RGD. Though tens of  
357 thousands of VOs were returned in each pilot, we developed an effective workflow to quickly filter VOs  
358 to those most likely to be disease-causing. While clinical review of the prioritized VOs is ongoing, there  
359 has been one diagnosis made in the newly described OMIM gene *POLR3B*, and one diagnosis made in  
360 the novel gene *CCDC6* where collaboration is ongoing. We anticipate that further review of prioritized  
361 VOs will lead to diagnoses in additional genes.

362 The OMIM gene and novel gene pilots highlight the importance of making participant-level information  
363 available when performing this type of matchmaking to rule out as many false positives as possible  
364 before undergoing more extensive case reviews. Knowing when variants are present in unaffected  
365 participants was highly effective in filtering VOs across genes associated with all inheritance patterns, in  
366 total removing 78% and 79% of the remaining VOs in the OMIM gene and novel gene pilots,  
367 respectively. Similarly, access to phenotypes in the form of HPO terms for affected participants enabled  
368 the removal of over 80% of the remaining VOs across both one-sided matchmaking pilots. Lastly,

369 zygosity information on VOs was especially effective as a filter for genes with a known or hypothesized  
370 AR inheritance pattern, resulting in the removal of over 90% of remaining VOs for both pilot studies. The  
371 utility of phenotypic and genotypic data in proactively ruling out potential matches is a trend that our  
372 team has also experienced with two-sided matchmaking - over half of two-sided matches were ruled out  
373 when such information was available at the time the initial match was made.<sup>8</sup> Increasing the inclusion of  
374 such participant-level information for matches submitted to the Matchmaker Exchange has been  
375 highlighted as an important factor to improve the efficiency of two-sided matchmaking,<sup>7</sup> and our pilots  
376 suggest that one-sided matchmaking platforms will not be successful without this data being made  
377 available.

378 While the beta version of the OSMP can provide the information necessary to make efficient one-sided  
379 matchmaking queries through an interface that is easy to use and customizable, these pilot studies  
380 provide insight into ways that the platform can be further improved for more widespread use. Providing  
381 on the fly annotations with CADD and gnomAD datasets ensures variant-level data returned by the  
382 OSMP remains accurate and harmonized across databases using different bioinformatics pipelines,  
383 however this feature is currently limited to genes less than 200,000 base pairs in size. Allocation of  
384 additional computing resources or performance improvements to the existing software may be required  
385 to ensure this feature is available to queries of genes of all sizes. Reviewing the VOs that were ruled out  
386 using data not directly available through the OSMP also indicates ways in which the platform can be  
387 improved. Knowledge of whether a variant has been classified in ClinVar, or if variants in XLR genes are  
388 seen in a hemizygous state in gnomAD, would both be useful to have available in the OSMP annotations.  
389 More detailed information on the inheritance of VOs (i.e., if a heterozygous variant is de novo vs  
390 inherited, or if multiple heterozygous variants are in cis or trans) would also improve the efficiency of  
391 one-sided matchmaking on this platform, as the results generated by the OSMP are not currently  
392 optimized for family-based analyses.

393 Finally, future versions of the OSMP will be expanded in both the number of users with access to the  
394 platform, and the number of connected databases. Upcoming OSMP development will focus on load  
395 testing the tool so that more users – both members of the Genomics4RD database and other third-party  
396 researchers - can utilize this resource. In this next phase, connecting additional databases to the OSMP  
397 will be crucial for both increasing the number of unsolved RGD patients made available for one-sided  
398 matchmaking and improving the OSMP’s ability to rule out existing VO’s of interest with an increased  
399 number of internal controls (i.e., unaffected family members). The OSMP is in the process of establishing  
400 a connection to the PhenoTips® database maintained by the Genomic Answers for Kids rare disease  
401 research program, which will enable the OSMP to query over 2,900 additional RGD participants with  
402 GWS data.

#### 403 **Conclusions**

404 The beta version of the OSMP can perform gene-level one-sided matchmaking queries for the purposes  
405 of prioritizing variants of interest in undiagnosed RGD patients. The development and piloting of the  
406 one-sided matchmaking workflow for both newly described disease-gene associations and novel  
407 candidate genes demonstrates both the sheer number of variant occurrences returned by gene-level  
408 queries, and the importance of variant-level and participant-level data in filtering possible matches  
409 down to a level more reasonable for users to review. Further, our pilots act as proof-of-principle that  
410 one-sided matchmaking can identify additional diagnoses and candidate genes. The lessons learned  
411 from piloting the beta version of the OSMP will be used to further refine the functionality of the  
412 platform, and we believe these insights will be of use to other groups developing similar tools. The  
413 connection of additional RGD databases to one-sided matchmaking services like the OSMP will be crucial  
414 in providing access to matchmaking for as many clinically undiagnosed RGD families as possible, in the  
415 hopes of identifying the genetic etiologies of their conditions.

416 **List of abbreviations**

417 **AD:** Autosomal dominant

418 **AR:** Autosomal recessive

419 **CADD:** Combined Annotation Dependent Depletion

420 **CMA:** Chromosomal microarray

421 **DECIPHER:** DatabasE of genomIc varIation and Phenotype in Humans using Ensembl Resources

422 **FORGE:** Finding of Rare Disease Genes

423 **GPAP:** Genome-Phenome Analysis Platform

424 **GWS:** Genome wide sequencing

425 **HPO:** Human Phenotype Ontology

426 **MME:** Matchmaker Exchange

427 **OMIM:** Online Mendelian Inheritance in Man

428 **OSMP:** One-Sided Matching Portal

429 **RGD:** Rare genetic disease

430 **UCSC:** University of California Santa Cruz

431 **VEP:** Variant Effect Predictor

432 **VO:** Variant occurrence

433 **XLR:** X-linked recessive

434

435 **Declarations**

436 **Ethics approval and consent to participate**

437 Informed consent was obtained for all participants that were queried by the OSMP in this study.

438 Participant-level data made available for the purposes of matchmaking was de-identified. Institutional

439 review board approval was obtained from the Children’s Hospital of Eastern Ontario for both Finding of

440 Rare Disease Genes in Canada (FORGE) and Care4Rare Canada (Research Ethics Board # 11/04E).

441 Institutional review board approval for Care4Rare-SOLVE was obtained from Clinical Trials Ontario

442 (CTO1577).

443 **Consent for publication**

444 Not applicable.

445 **Availability of data and materials**

446 The source code for the OSMP is available at <https://github.com/ccmbioinfo/osmp>. Access to the beta

447 version of the OSMP is currently limited to a small set of Genomics4RD users. The genotypic and

448 phenotypic data that support the findings of this study are located in the controlled access database

449 Genomics4RD. Genomics4RD open access data is available at <https://www.genomics4rd.ca/>.

450 **Competing interests**

451 OJB and MB have an equity interest in, and OJB is an employee of PhenoTips®, which licenses software

452 used in the Genomics4RD database.

453 **Funding**

454 This study was funded through the *Genomics and Precision Health Top-up* grant GPT-174518  
455 “Care4Rare-Solve: Efficient cross-border matchmaking to deliver diagnoses for rare genetic diseases”,  
456 awarded by the Canadian Institutes of Health Research.

457 The development of Genomics4RD and the production of its housed GWS data was performed under the  
458 Care4Rare Canada Consortium funded by Genome Canada and the Ontario Genomics Institute (OGI-  
459 147), the Canadian Institutes of Health Research, Ontario Research Fund, Genome Alberta, Genome  
460 British Columbia, Genome Quebec, and Children’s Hospital of Eastern Ontario Foundation.

461 T.H. was supported by a Frederick Banting and Charles Best Canada Graduate Scholarship Doctoral  
462 Award from Canadian Institutes of Health Research. MB is a CIFAR AI Chair. KMB was supported by a  
463 Canadian Institutes of Health Research Foundation grant FDN-154279 and a Tier 1 Canada Research  
464 Chair in Rare Disease Precision Health. The work at Children’s Mercy Kansas City is supported by  
465 generous donors to Children’s Mercy Research Institute and Genomic Answer For Kids program.

466 **Authors' contributions**

467 Funding acquisition for this study was conducted by EMP, TH, TP, MB, and KMB. MO, EMP, OJB, TH, CK,  
468 ALT, TP, MB, and KMB contributed to the conceptualization and high-level design of OSMP.

469 Development and testing of OSMP was performed by MO, EMP, OJB, MF, MC, CK, HGBHL, JX, DS, KL,  
470 KM, HW, HGD, ALT, and MB. Curation of the data to be queried by OSMP was conducted by EMP, MC,  
471 AJ, HW, HGD, WC, AC, EF, and IT. MO, EMP, and TH designed the one-sided matchmaking workflow.

472 MO, HW, and EW collected the data generated from the OSMP pilot studies. Data analysis from the pilot  
473 studies was performed by MO and EMP. The initial manuscript draft was written by MO, EMP, and KMB.

474 All authors have read and approved the final manuscript.

475 **Acknowledgements**

476 We would like to acknowledge Alina Gvozdik, John Q. Miller, Joel John, Kevin M. Power, John N. Gregor,  
477 and Bourke B. Hutchison for their contributions towards establishing API connections between the  
478 OSMP and its connected databases.



## 479 References

- 480 1. Clark MM, Stark Z, Farnaes L, et al. Meta-analysis of the diagnostic and clinical utility of genome  
481 and exome sequencing and chromosomal microarray in children with suspected genetic  
482 diseases. *NPJ Genom Med*. 2018;3(1):1-16. <https://doi.org/10.1038/s41525-018-0053-8>
- 483 2. Miller DT, Adam MP, Aradhya S, et al. Consensus Statement: Chromosomal Microarray Is a First-  
484 Tier Clinical Diagnostic Test for Individuals with Developmental Disability or Congenital  
485 Anomalies. *Am J Hum Genet*. 2010;86(5):749-764. <https://doi.org/10.1016/j.ajhg.2010.04.006>
- 486 3. Tan NB, Stapleton R, Stark Z, et al. Evaluating systemic reanalysis of clinical genomic data in rare  
487 disease from single center experience and literature review. *Mol Genet Genomic Med*.  
488 2020;8(11):1-19. <https://doi.org/10.1002/mgg3.1508>
- 489 4. Hartley T, Soubry É, Acker M, et al. Bridging clinical care and research in Ontario, Canada:  
490 Maximizing diagnoses from reanalysis of clinical exome sequencing data. *Clin Genet*.  
491 2023;103(3):288-300. <https://doi.org/10.1111/cge.14262>
- 492 5. Bamshad MJ, Nickerson DA, Chong JX. Mendelian Gene Discovery: Fast and Furious with No End  
493 in Sight. *Am J Hum Genet*. 2019;105(3):448-455. <https://doi.org/10.1016/j.ajhg.2019.07.011>
- 494 6. Strande NT, Rooney Riggs E, Buchanan AH, et al. Evaluating the Clinical Validity of Gene-Disease  
495 Associations: An Evidence-Based Framework Developed by the Clinical Genome Resource. *Am J*  
496 *Hum Genet*. 2017;100(6):895-906. <https://doi.org/10.1016/j.ajhg.2017.04.015>
- 497 7. Boycott KM, Azzariti DR, Hamosh A, Rehm HL. Seven years since the launch of the Matchmaker  
498 Exchange: The evolution of genomic matchmaking. *Hum Mutat*. 2022;43(6):659-667.  
499 <https://doi.org/10.1002/humu.24373>
- 500 8. Osmond M, Hartley T, Dymont DA, et al. Outcome of over 1500 matches through the  
501 Matchmaker Exchange for rare disease gene discovery: The 2-year experience of Care4Rare  
502 Canada. *Genet Med*. 2022;24(1):100-108. <https://doi.org/10.1016/j.gim.2021.08.014>

- 503 9. Stark Z, Dolman L, Manolio TA, et al. Integrating Genomics into Healthcare: A Global  
504 Responsibility. *Am J Hum Genet.* 2019;104(1):13-20. <https://doi.org/10.1016/j.ajhg.2018.11.014>
- 505 10. Cranage A. Our UK Biobank Journey: 3 years and over 240,000 human genomes. Wellcome  
506 Sanger Institute. September 16, 2022. Accessed August 15, 2023.  
507 [https://sangerinstitute.blog/2022/09/26/our-uk-biobank-journey-3-years-and-over-240000-](https://sangerinstitute.blog/2022/09/26/our-uk-biobank-journey-3-years-and-over-240000-human-genomes/)  
508 [human-genomes/](https://sangerinstitute.blog/2022/09/26/our-uk-biobank-journey-3-years-and-over-240000-human-genomes/)
- 509 11. Rodrigues ES, Griffith S, Martin R, et al. Variant-level matching for diagnosis and discovery:  
510 Challenges and opportunities. *Hum Mutat.* 2022;43(6):782-790.  
511 <https://doi.org/10.1002/humu.24359>
- 512 12. Foreman J, Brent S, Perrett D, et al. DECIPHER: Supporting the interpretation and sharing of rare  
513 disease phenotype-linked variant data to advance diagnosis and research. *Hum Mutat.*  
514 2022;43(6):682-697. <https://doi.org/10.1002/humu.24340>
- 515 13. Laurie S, Piscia D, Matalonga L, et al. The RD-Connect Genome-Phenome Analysis Platform:  
516 Accelerating diagnosis, research, and gene discovery for rare diseases. *Hum Mutat.*  
517 2022;43(6):717-733. <https://doi.org/10.1002/humu.24353>
- 518 14. Pais LS, Snow H, Weisburd B, et al. *seqr*: A web-based analysis and collaboration tool for rare  
519 disease genomics. *Hum Mutat.* 2022;43(6):698-707. <https://doi.org/10.1002/humu.24366>
- 520 15. Girdea M, Dumitriu S, Fiume M, et al. PhenoTips: patient phenotyping software for clinical and  
521 research use. *Hum Mutat.* 2013;34(8):1057-1065. <https://doi.org/10.1002/humu.22347>
- 522 16. Rentzsch P, Witten D, Cooper GM, Shendure J, Kircher M. CADD: predicting the deleteriousness  
523 of variants throughout the human genome. *Nucleic Acids Res.* 2019;47(D1):D886-D894.  
524 <https://doi.org/10.1093/nar/gky1016>
- 525 17. Jaganathan K, Panagiotopoulou SK, McRae JF, et al. Predicting Splicing from Primary Sequence  
526 with Deep Learning. *Cell.* 2019;176(3):535-548. <https://doi.org/10.1016/j.cell.2018.12.015>

- 527 18. Karczewski KJ, Francioli LC, Tiao G, et al. The mutational constraint spectrum quantified from  
528 variation in 141,456 humans. *Nature*. 2020;581:434-443. [https://doi.org/10.1038/s41586-020-](https://doi.org/10.1038/s41586-020-2308-7)  
529 [2308-7](https://doi.org/10.1038/s41586-020-2308-7)
- 530 19. Köhler S, Gargano M, Matentzoglou N, et al. The Human Phenotype Ontology in 2021. *Nucleic*  
531 *Acids Res*. 2021;49(D1):D1207-D1217. <https://doi.org/10.1093/nar/gkaa1043>
- 532 20. Driver H, Hartley T, Price EM, et al. Genomics4RD: An integrated platform to share Canadian  
533 deep-phenotype and multi-omic data for international rare disease gene discovery. *Hum Mutat*.  
534 2022;43(6):800-811. <https://doi.org/10.1002/humu.24354>
- 535 21. Boycott KM, Hartley T, Kernohan KD, et al. Care4Rare Canada: Outcomes from a decade of  
536 network science for rare disease gene discovery. *Am J Hum Genet*. 2022;109(11):1947-1959.  
537 <https://doi.org/10.1016/j.ajhg.2022.10.002>
- 538 22. Centre for Computational Medicine. Crg2: Clinical research pipeline. Github. Updated July 25,  
539 2023. Accessed August 15, 2023. <https://github.com/ccmbioinfo/crg2>
- 540 23. McLaren W, Gil L, Hunt SE, et al. The Ensembl Variant Effect Predictor. *Genome Biol*.  
541 2016;17(1):122-136. <https://doi.org/10.1186/s13059-016-0974-4>

## 542 **Figure legends**

543 **Fig. 1.** The One-Sided Matchmaking Platform (OSMP). Queries made for a gene of interest return data  
544 from three sources: **(a)** Variant information - basic information on variants identified in the PhenoTips®  
545 variant store. **(b)** Variant annotations - extracted from CADD and gnomAD datasets. **(c)** Participant-level  
546 details - phenotypic and genotypic details from individual PhenoTips® record

547

548 **Fig. 2.** One-sided matchmaking workflow and details of variant occurrences (VOs) returned by the OMIM  
549 gene pilot queries (n=130 disease-gene associations). Filtration steps are indicated by dark grey boxes,  
550 and VOs removed by each filter is indicated by light grey boxes. Percentages indicate the proportion of

551 VOs from the previous step that were filtered out. AD: autosomal dominant, XLR: X-linked recessive, AR:  
552 autosomal recessive.

553 **Fig 3.** One-sided matchmaking workflow for variant occurrences (VOs) returned by the novel gene pilot  
554 queries (n = 178 novel candidate genes). Filtration steps are indicated by dark grey boxes, and VOs  
555 removed by filters are indicated by light grey boxes. Percentages indicate the proportion of VOs from  
556 the previous step that were filtered out. AD: autosomal dominant, XLR: X-linked recessive, AR:  
557 autosomal recessive.

#### 558 **Additional Files**

559 **Additional file 1.pdf** Overview of data columns returned or generated by the OSMP

Genome Assembly \* GRCh37 Gene Name \* ABHD16A Max Frequency \* 0.01 Contributors \* g4rd \* Required Field

Search Clear

All Gene Hits (1) Fetched

ABHD16A (Chromosome: 6, Start: 31654726, End: 31671221)

Search All Columns... Clear all filters 39 unique variants found in 85 individuals Customize columns Export Data

**a) Variant information**

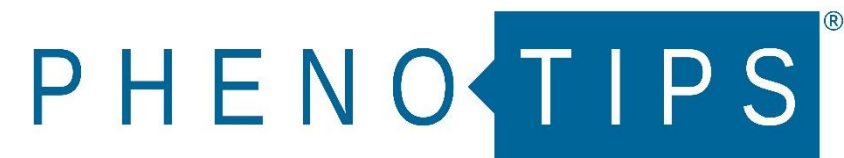

| CHR  | POS      | GENE    | REF | ALT |
|------|----------|---------|-----|-----|
| ...  |          |         |     |     |
| chr6 | 31656524 | ABHD16A | A   | C   |
| ...  |          |         |     |     |

| Chr | Start    | End      | Ref | Alt | Original Assembly | Current Assembly | Source |
|-----|----------|----------|-----|-----|-------------------|------------------|--------|
| 6   | 31656524 | 31656524 | A   | C   | GRCh37            | GRCh37           | g4rd   |

medRxiv preprint doi: <https://doi.org/10.1101/2024.09.03.24313012>; this version posted September 4, 2024. The copyright holder for this preprint (which was not certified by peer review) is the author/funder, who has granted medRxiv a license to display the preprint in perpetuity. It is made available under a [CC-BY-NC-ND 4.0 International license](https://creativecommons.org/licenses/by-nc-nd/4.0/).

**b) Variant annotations**

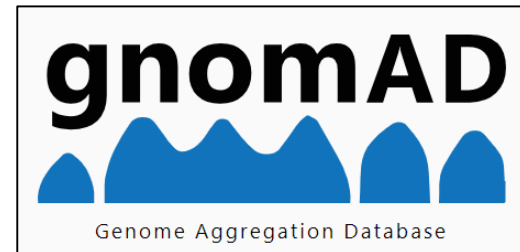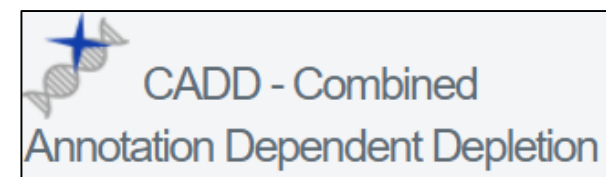

| transcript      | Homo Count | Het Count | cdna      | aaChange    | consequence    | gnomAD_AF | gnomadHorr | CADD score | SpliceAI score | SpliceAI type |
|-----------------|------------|-----------|-----------|-------------|----------------|-----------|------------|------------|----------------|---------------|
| ENST00000395952 | 1          | 0         | c.1389A>C | p.Leu409Arg | NON_SYNONYMOUS | 0         | 0          | 29.3       | 0              | NA            |

**c) Participant-level details**

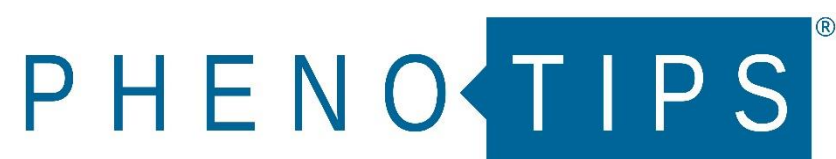

**Clinical symptoms and physical findings**

**MUSCULOSKELETAL**  
Joint contracture of the hand

**BEHAVIOR, COGNITION AND DEVELOPMENT**  
Global developmental delay

**NEUROLOGICAL**  
Spasticity  
Hypoplasia of the corpus callosum  
Neurodegeneration

**Genotype information**

**LIST OF GENES**

| GENE      | STATUS           | STRATEGY |
|-----------|------------------|----------|
| 1 ABHD16A | Confirmed causal |          |

| Zygoty     | Burden Count | AD | DP  | Individual ID | Family ID | Sex    | Affected Status | Flagged Gene(s)  | Present Phenotypes                                                                                                                                                                                                  | Absent Phenotypes | Ethnicity |
|------------|--------------|----|-----|---------------|-----------|--------|-----------------|------------------|---------------------------------------------------------------------------------------------------------------------------------------------------------------------------------------------------------------------|-------------------|-----------|
| Homozygous | 1            | 79 | 221 | P000          | FAM000    | Female | affected        | ABHD16A - solved | <a href="#">Spasticity</a><br><a href="#">Global developmental delay</a><br><a href="#">Hypoplasia of the corpus callosum</a><br><a href="#">Neurodegeneration</a><br><a href="#">Joint contracture of the hand</a> |                   |           |

**12,872** rare variant occurrences (**130** OMIM disease-gene associations)

medRxiv preprint doi: <https://doi.org/10.1101/2024.09.03.24313012>; this version posted September 4, 2024. The copyright holder for this preprint (which was not certified by peer review) is the author/funder, who has granted medRxiv a license to display the preprint in perpetuity. It is made available under a [CC-BY-NC-ND 4.0 International license](#).

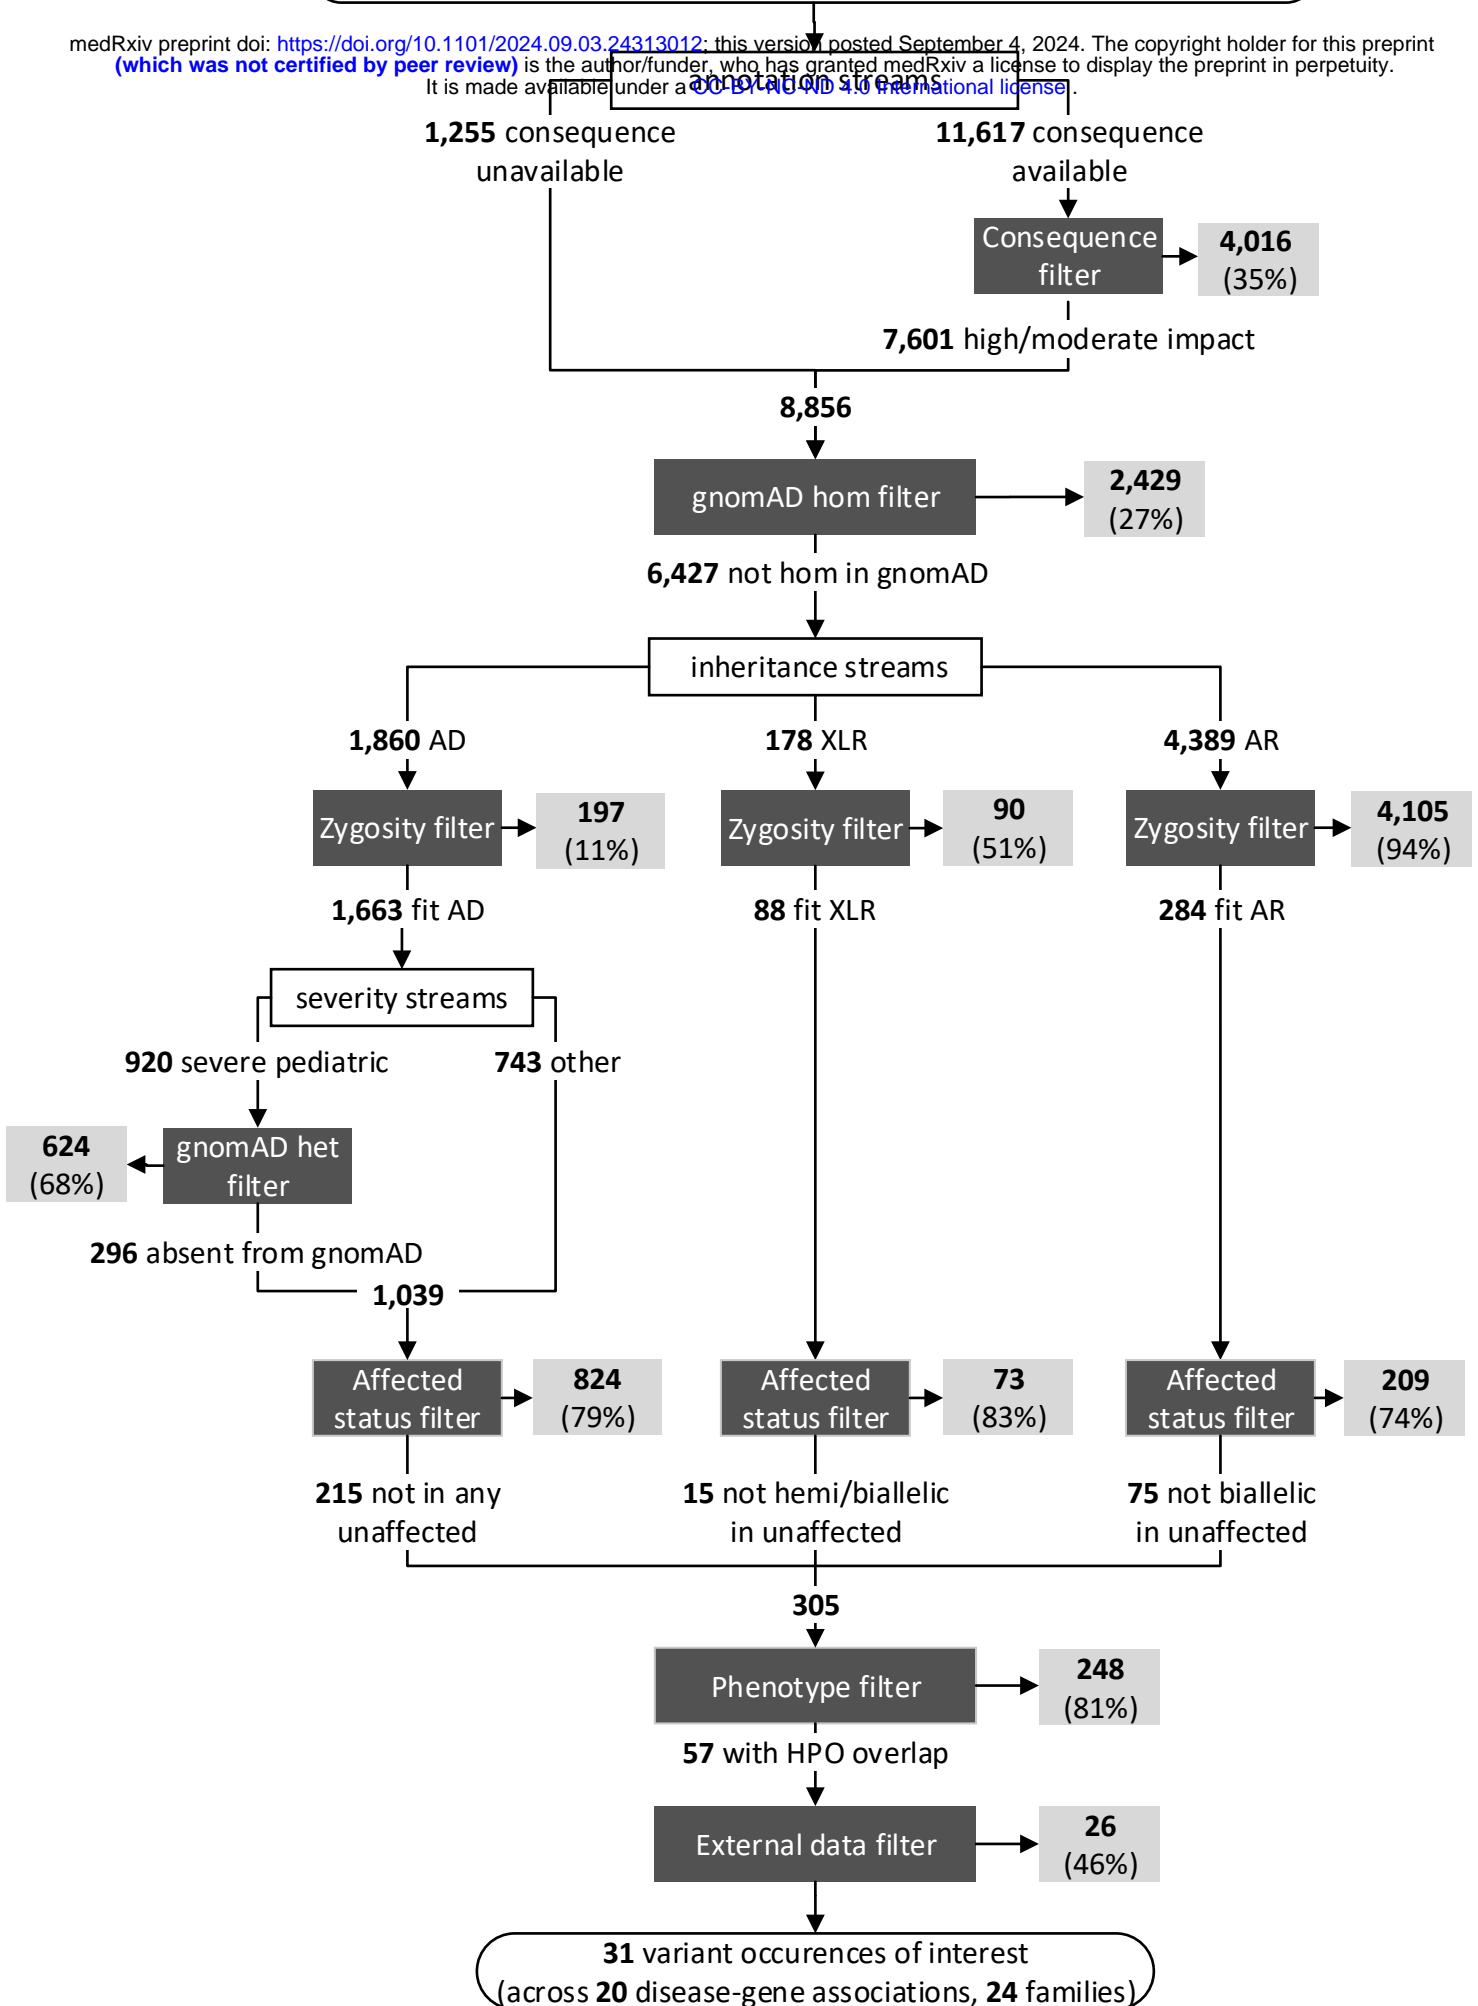

20,308 rare variant occurrences (178 novel candidate genes)

medRxiv preprint doi: <https://doi.org/10.1101/2024.09.03.24313012>; this version posted September 4, 2024. The copyright holder for this preprint (which was not certified by peer review) is the author/funder, who has granted medRxiv a license to display the preprint in perpetuity. It is made available under a [CC-BY-NC-ND 4.0 International license](#).

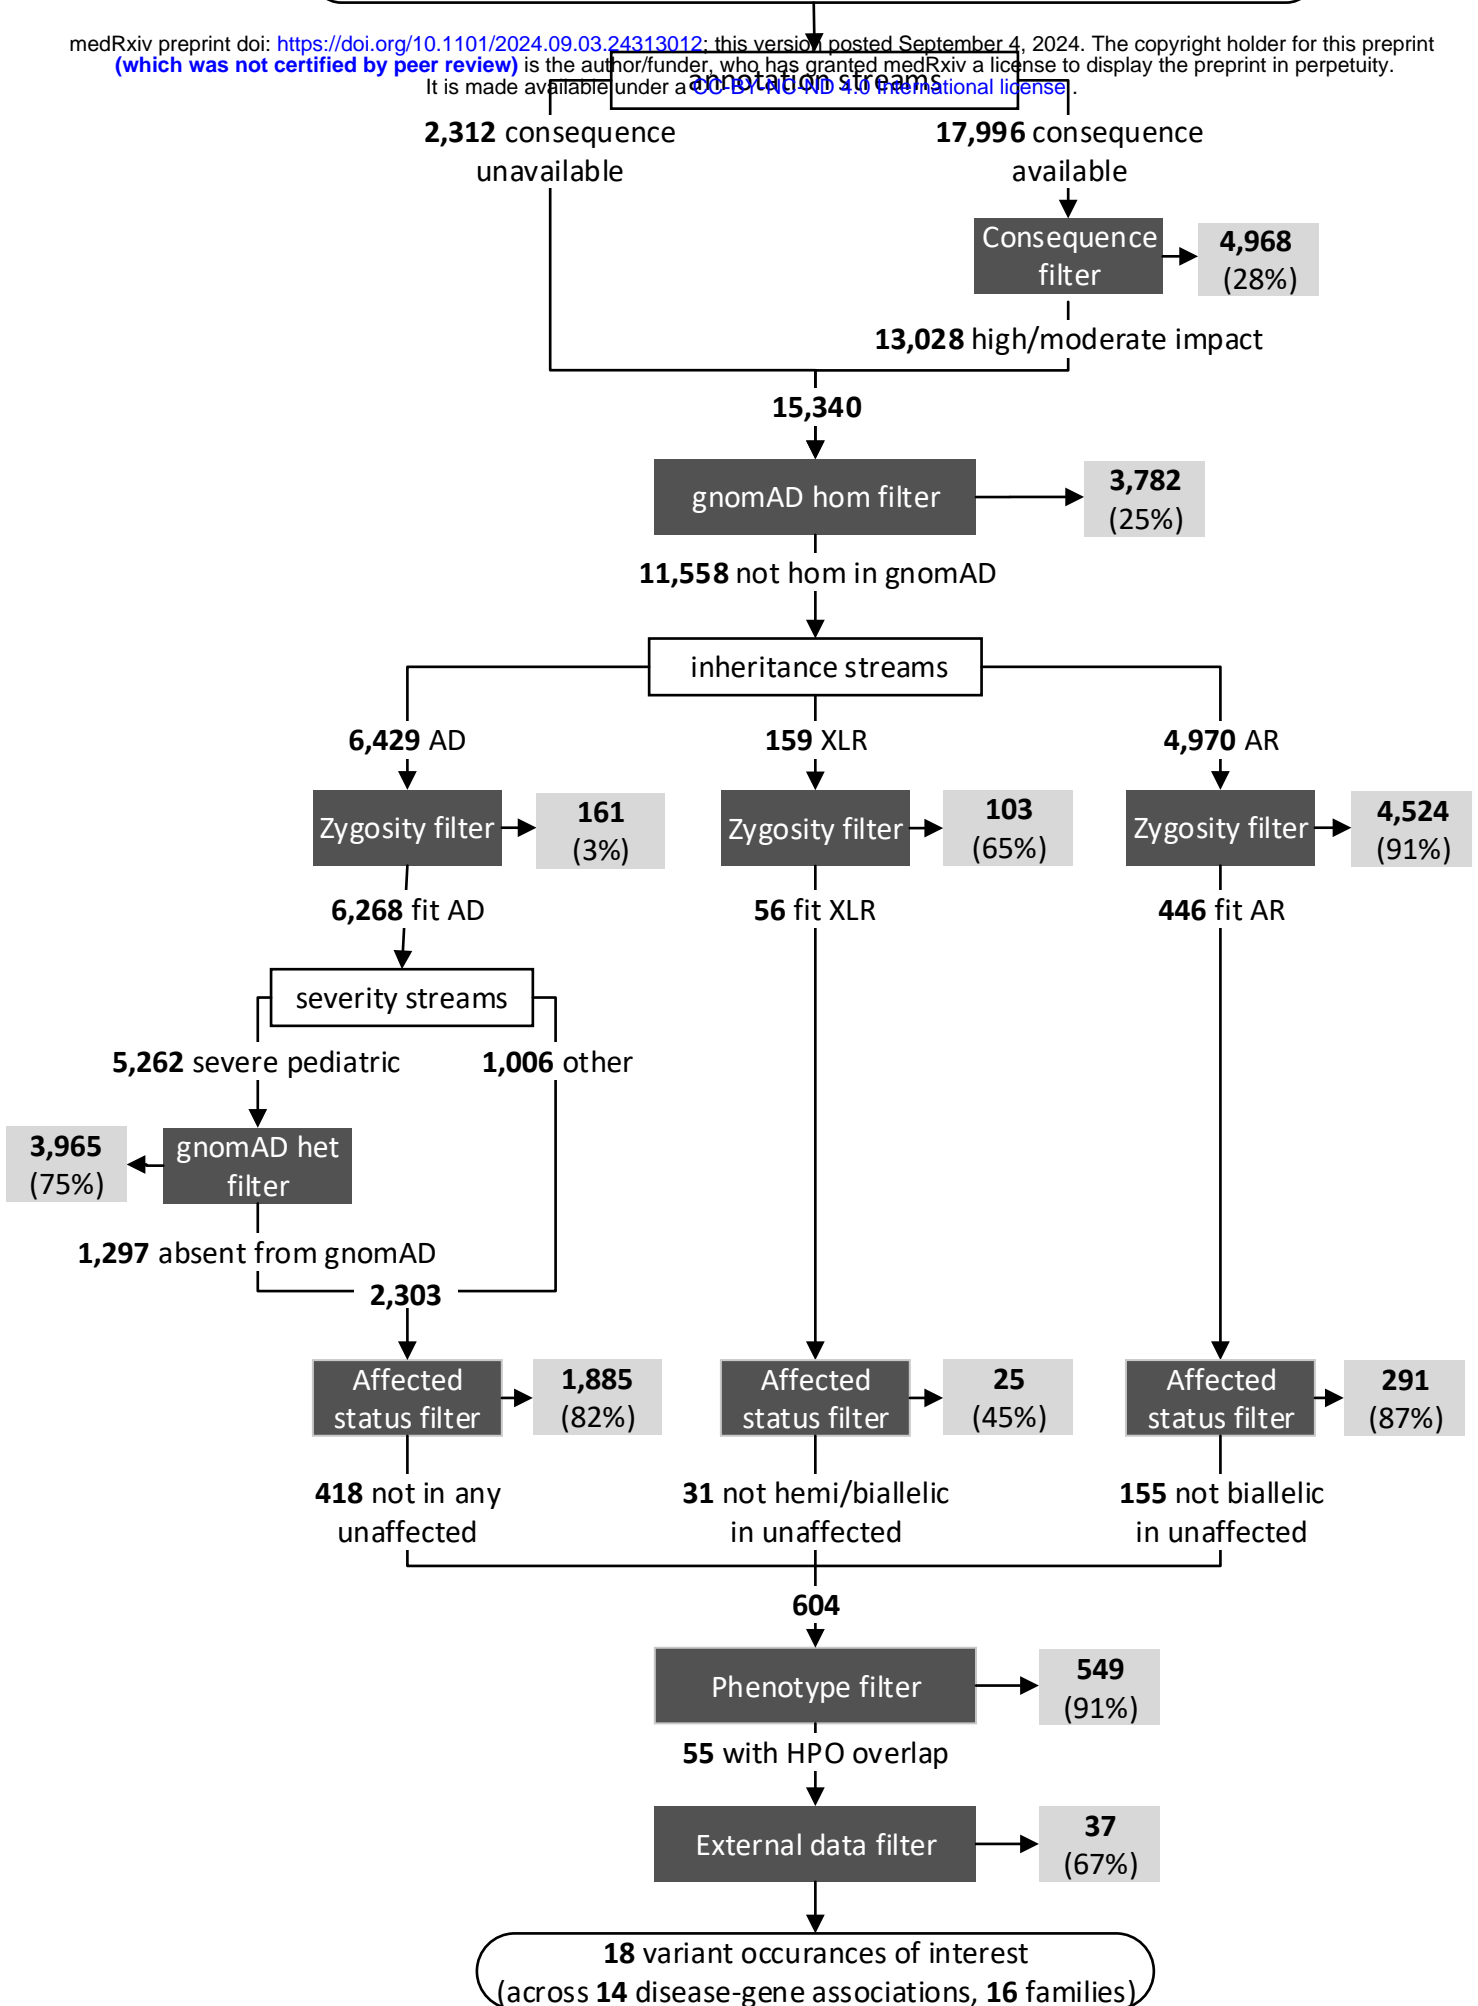

Source: https://medrxiv.org/content/10.1101/2024.09.03.24313012v1.full.pdf
